# Supplementary material for: On the Effect of Thermodynamic Equilibrium on the Assembly Efficiency of Complex Multi-Layered Virus-Like Particles (VLP): the Case of Rotavirus VLP
Source: PLoS Comput Biol. 2012 Feb 16;8(2):e1002367. doi: 10.1371/journal.pcbi.1002367 (PMC3280969; doi:10.1371/journal.pcbi.1002367)
Supplement: Table S1 — Assembly intermediates and factors describing the formation of single-layered vp2 particles (SLP). (DOC) [file pcbi.1002367.s001.doc]

**Table S1.** Assembly intermediates and factors describing the formation of the vp7 layer, from 20 vp7 structural subunits, on top of DLP.

| **n** | **Model** | **Build** | | **S1,n** | **Nc,n** | **[n]** |  | **n** | **Model** | **Build** | | **S1,n** | **Nc,n** | **[n]** |
| --- | --- | --- | --- | --- | --- | --- | --- | --- | --- | --- | --- | --- | --- | --- |
| **up** | **down** | **up** | **down** |
| 40 |  | DLPs | | | | |  | 51 |  | 6 | 1 | 6/1 | 2 |  |
| 41 |  | 20 | 1 | 20/1 | 1 |  |  | 52 |  | 1 | 4 | 1/4 | 3 |  |
| 42 |  | 3 | 1 | 3/1 | 2 |  |  | 53 |  | 2 | 1 | 2/1 | 2 |  |
| 43 |  | 4 | 2 | 4/2 | 2 |  |  | 54 |  | 2 | 2 | 2/2 | 3 |  |
| 44 |  | 2 | 2 | 2/2 | 2 |  |  | 55 |  | 1 | 5 | 1/5 | 3 |  |
| 45 |  | 1 | 5 | 1/5 | 3 |  |  | 56 |  | 5 | 1 | 5/1 | 2 |  |
| 46 |  | 5 | 1 | 5/1 | 2 |  |  | 57 |  | 2 | 2 | 2/2 | 3 |  |
| 47 |  | 2 | 2 | 2/2 | 2 |  |  | 58 |  | 2 | 4 | 2/4 | 3 |  |
| 48 |  | 1 | 2 | 1/2 | 3 |  |  | 59 |  | 2 | 3 | 2/3 | 3 |  |
| 49 |  | 4 | 1 | 4/1 | 2 |  |  | 60 |  | 1 | 20 | 1/20 | 4 |  |
| 50 |  | 1 | 6 | 1/6 | 3 |  |  |  |  |  |  |  |  |  |
