# Supplementary material for: On the Effect of Thermodynamic Equilibrium on the Assembly Efficiency of Complex Multi-Layered Virus-Like Particles (VLP): the Case of Rotavirus VLP
Source: PLoS Comput Biol. 2012 Feb 16;8(2):e1002367. doi: 10.1371/journal.pcbi.1002367 (PMC3280969; doi:10.1371/journal.pcbi.1002367)
Supplement: Table S2 — Assembly intermediates and factors describing the formation of the first vp6 structural subunit, from the interaction between vp6 trimers (building blocks), on top of SLP. (DOC) [file pcbi.1002367.s002.doc]

**Table S2.** Assembly intermediates and factors describing the formation of single-layered vp2 particles (SLP).

| **n** | **Model** | **Build** | | **S1,n** | **Nc,n** | **[n]** |  | **n** | **Model** | **Build** | | **S1,n** | **Nc,n** | **[n]** |
| --- | --- | --- | --- | --- | --- | --- | --- | --- | --- | --- | --- | --- | --- | --- |
| **up** | **down** | **up** | **down** |
| 1 |  | - | - | - | - | [1] |  | 11 |  | 6 | 1 | 6/1 | 1 |  |
| 2 |  | 3/2a | 1 | 3/2 | 1 |  |  | 12 |  | 1 | 4 | 1/4 | 2 |  |
| 3 |  | 4 | 2 | 4/2 | 1 |  |  | 13 |  | 2 | 1 | 2/1 | 1 |  |
| 4 |  | 2 | 2 | 2/2 | 1 |  |  | 14 |  | 2 | 2 | 2/2 | 2 |  |
| 5 |  | 1 | 5 | 1/5 | 2 |  |  | 15 |  | 1 | 5 | 1/5 | 2 |  |
| 6 |  | 5 | 1 | 5/1 | 1 |  |  | 16 |  | 5 | 1 | 5/1 | 1 |  |
| 7 |  | 2 | 2 | 2/2 | 1 |  |  | 17 |  | 2 | 2 | 2/2 | 2 |  |
| 8 |  | 1 | 2 | 1/2 | 2 |  |  | 18 |  | 2 | 4 | 2/4 | 2 |  |
| 9 |  | 4 | 1 | 4/1 | 1 |  |  | 19 |  | 2 | 3 | 2/3 | 2 |  |
| 10 |  | 1 | 6 | 1/6 | 2 |  |  | 20 |  | 1 | 20 | 1/20 | 3 |  |
| a The build-up factor 3/2, instead of the logically factor 3, is due to the degeneracy of the asymmetric unit. | | | | | | | | | | | | | | |
